# Supplementary material
Source: HighWire-hosted journal article supplement (https://bmjopen.bmj.com/content/15/1/e087832)
Supplement: inline-supplementary-material-3 [file inline-supplementary-material-3.pdf]

# Questionnaire

Please complete the survey below.

Thank you!

Date and time of visit

Cohort ID

(i.e. "2\_1")

Cluster ID is incorrect.

Structure ID

(Typing the ID shown on the structure. i.e, "malela-10-10")

First name

Middle name

Last name

This participant is available for the survey.

- ☐ Yes  
☐ No

Please select the reason why the participant is not available.

- ☐ Moved out from the area (will never come back)  
☐ Travel to another village in Ndhiwa  
☐ Travel to Homa Bay County other than Ndhiwa  
☐ Travel to Another county in Kenya  
☐ Travel to Another country  
☐ Refuse  
☐ Do not know (Could not find)  
☐ Others

Please indicate when he/she will be back.  
(If you do not know, please write 0.)

Specify the reason.

Did [name\_f] spend any nights outside [name\_f]'s house in the last four weeks?

- ☐ Yes  
☐ No

Where did [name\_f] spend those nights?

- ☐ Another house in your village  
☐ Another village in Ndhiwa  
☐ Homa Bay County other than Ndhiwa  
☐ Another county in Kenya  
☐ Another country

How many nights did [name\_f] spend in another house in [name\_f]'s village? \_\_\_\_\_

Did you see the ceiling nets in the household you visited in another house in the village?

- ☐ Yes  
☐ No

How many nights did [name\_f] spend in another village in Ndhiwa? \_\_\_\_\_

Did you see the ceiling nets in the household you visited in another village in Ndhiwa?

- ☐ Yes  
☐ No

How many nights did [name\_f] spend in Homa Bay County other than Mfangano and Mbita? \_\_\_\_\_

How many nights did [name\_f] spend in another county in Kenya? \_\_\_\_\_

How many nights did [name\_f] spend in another country? \_\_\_\_\_

Did [name\_f] visit any health facility in the last four weeks?

- ☐ Yes  
☐ No

(Please refer to the booklet)

Did [name\_f] have the following symptoms at any point in the past four weeks?

- ☐ Fever  
☐ Chills  
☐ Profuse sweating  
☐ Muscle/joint pain  
☐ Abdominal pain  
☐ Diarrhoea  
☐ Nausea  
☐ Vomiting  
☐ Irritability  
☐ Refusal to feed  
☐ Prostration (difficulty to sit upright)  
☐ Alteration in the level of consciousness  
☐ Convulsions or coma  
☐ Difficulty in breathing/respiratory distress  
☐ Jaundice  
☐ Others  
☐ None

Please list other symptoms [name\_f] experienced in the past four weeks. \_\_\_\_\_

How many times did the child visit health facilities?

- ☐ One time  
☐ Two time  
☐ Three time  
☐ More than three

---

When did [name\_f] visit the health facility?

---

(Please refer to the booklet)

---

Which health facility did [name\_f] visit?

(Please refer to the booklet)

- ☐ Malela level 4 hospital
- ☐ Kabongo HC
- ☐ Andiwo HC
- ☐ Wikomimo HC
- ☐ Abuoro HC
- ☐ Langi HC
- ☐ Kobodo HC
- ☐ Okok HC
- ☐ Other

---

Please state the health facility [name\_f] visited.

---

---

Which symptoms did the child have?

(Please refer to the booklet)

- ☐ Fever
- ☐ Headache
- ☐ Muscle pain
- ☐ Abdominal pain
- ☐ Nausea
- ☐ Vomiting
- ☐ Diarrhea
- ☐ Convulsions or coma
- ☐ Jaundice
- ☐ Rapid breathing
- ☐ Difficulty in breathing/respiratory distress
- ☐ Pale conjunctivae/palms
- ☐ Loss of reactivity
- ☐ Others

---

When did the symptom start?

---

(Please refer to the booklet)

---

Was [name\_f] diagnosed with malaria?

- ☐ Yes
- ☐ No

(Please refer to the booklet)

---

What was the diagnosis?

---

---

Did [name\_f] take any treatment or medication?

- ☐ Yes
- ☐ No

(Please refer to the booklet)

What treatment or medication did [name\_f] receive from the health facility?

(Please refer to the booklet)

- ☐ AL
- ☐ DHAP
- ☐ OTHER ACT (NOT AL OR DHAP)
- ☐ SP/FANSIDAR
- ☐ CHLOROQUINE
- ☐ AMODIAQUINE
- ☐ QUININE (PILLS)
- ☐ QUININE (INJECTION/IV)
- ☐ ARTESUNATE (RECTAL)
- ☐ ARTESUNATE (INJECTION/IV)
- ☐ OTHER ANTIMALARIAL
- ☐ AMOXICILLIN
- ☐ COTRIMOXAZOLE
- ☐ OTHER ANTIBIOTIC MEDICINE (PILL/SYRUP)
- ☐ OTHER ANTIBIOTIC MEDICINE (INJECTION/IV)
- ☐ ASPIRIN
- ☐ PARACETAMOL/PANADOL/ACETAMINOPHEN
- ☐ IBUPROFEN
- ☐ OTHER
- ☐ DON'TKNOW

Please list other medications [name\_f] received from the health facility.

\_\_\_\_\_

When did [name\_f] FIRST visit the health facility?

\_\_\_\_\_

(Please refer to the booklet)

Which health facility did [name\_f] first visit?

(Please refer to the booklet)

- ☐ Malela level 4 hospital
- ☐ Kabongo HC
- ☐ Andiwo HC
- ☐ Wikomimo HC
- ☐ Abuoro HC
- ☐ Langi HC
- ☐ Kobodo HC
- ☐ Okok HC
- ☐ Other

Please state the health facility [name\_f] visited.

\_\_\_\_\_

Which symptoms did the child have at the first visit?

(Please refer to the booklet)

- ☐ Fever
- ☐ Headache
- ☐ Muscle pain
- ☐ Abdominal pain
- ☐ Nausea
- ☐ Vomiting
- ☐ Diarrhea
- ☐ Convulsions or coma
- ☐ Jaundice
- ☐ Rapid breathing
- ☐ Difficulty in breathing/respiratory distress
- ☐ Pale conjunctivae/palms
- ☐ Loss of reactivity
- ☐ Others

---

When did the symptoms for the first visit start?

---

(Please refer to the booklet)

---

Was [name\_f] diagnosed with malaria for the first visit?

- ☐ Yes  
☐ No

(Please refer to the booklet)

---

What was the diagnosis?

---

---

Did [name\_f] take any treatment or medication for the first visit?

- ☐ Yes  
☐ No

(Please refer to the booklet)

---

What treatment or medication did [name\_f] receive from the health facility?

(Please refer to the booklet)

- ☐ AL  
☐ DHAP  
☐ OTHER ACT (NOT AL OR DHAP)  
☐ SP/FANSIDAR  
☐ CHLOROQUINE  
☐ AMODIAQUINE  
☐ QUININE (PILLS)  
☐ QUININE (INJECTION/IV)  
☐ ARTESUNATE (RECTAL)  
☐ ARTESUNATE (INJECTION/IV)  
☐ OTHER ANTIMALARIAL  
☐ AMOXICILLIN  
☐ COTRIMOXAZOLE  
☐ OTHER ANTIBIOTIC MEDICINE (PILL/SYRUP)  
☐ OTHER ANTIBIOTIC MEDICINE (INJECTION/IV)  
☐ ASPIRIN  
☐ PARACETAMOL/PANADOL/ACETAMINOPHEN  
☐ IBUPROFEN  
☐ OTHER  
☐ DON'TKNOW

---

Please list other medications [name\_f] received from the health facility.

---

---

When did [name\_f] SECOND visit the health facility?

---

(Please refer to the booklet)

---

Which health facility did [name\_f] second visit?

(Please refer to the booklet)

- ☐ Malela level 4 hospital  
☐ Kabongo HC  
☐ Andiwo HC  
☐ Wikomimo HC  
☐ Abuoro HC  
☐ Langi HC  
☐ Kobodo HC  
☐ Okok HC  
☐ Other

Please state the health facility [name\_f] visited.

---

Which symptoms did the child have at the second visit?

(Please refer to the booklet)

- ☐ Fever
- ☐ Headache
- ☐ Muscle pain
- ☐ Abdominal pain
- ☐ Nausea
- ☐ Vomiting
- ☐ Diarrhea
- ☐ Convulsions or coma
- ☐ Jaundice
- ☐ Rapid breathing
- ☐ Difficulty in breathing/respiratory distress
- ☐ Pale conjunctivae/palms
- ☐ Loss of reactivity
- ☐ Others

When did the symptoms for the second visit start?

---

(Please refer to the booklet)

Was [name\_f] diagnosed with malaria for the second visit?

- ☐ Yes
- ☐ No

(Please refer to the booklet)

What was the diagnosis?

---

Did [name\_f] take any treatment or medication for the second visit?

- ☐ Yes
- ☐ No

(Please refer to the booklet)

What treatment or medication did [name\_f] receive from the health facility?

(Please refer to the booklet)

- ☐ AL
- ☐ DHAP
- ☐ OTHER ACT (NOT AL OR DHAP)
- ☐ SP/FANSIDAR
- ☐ CHLOROQUINE
- ☐ AMODIAQUINE
- ☐ QUININE (PILLS)
- ☐ QUININE (INJECTION/IV)
- ☐ ARTESUNATE (RECTAL)
- ☐ ARTESUNATE (INJECTION/IV)
- ☐ OTHER ANTIMALARIAL
- ☐ AMOXICILLIN
- ☐ COTRIMOXAZOLE
- ☐ OTHER ANTIBIOTIC MEDICINE (PILL/SYRUP)
- ☐ OTHER ANTIBIOTIC MEDICINE (INJECTION/IV)
- ☐ ASPIRIN
- ☐ PARACETAMOL/PANADOL/ACETAMINOPHEN
- ☐ IBUPROFEN
- ☐ OTHER
- ☐ DON'TKNOW

Please list other medications [name\_f] received from the health facility.

---

---

When did [name\_f] THIRD visit the health facility?

---

(Please refer to the booklet)

---

Which health facility did [name\_f] third visit?

(Please refer to the booklet)

- ☐ Malela level 4 hospital
- ☐ Kabongo HC
- ☐ Andiwo HC
- ☐ Wikomimo HC
- ☐ Abuoro HC
- ☐ Langi HC
- ☐ Kobodo HC
- ☐ Okok HC
- ☐ Other

---

Please state the health facility [name\_f] visited.

---

---

Which symptoms did the child have at the third visit?

(Please refer to the booklet)

- ☐ Fever
- ☐ Headache
- ☐ Muscle pain
- ☐ Abdominal pain
- ☐ Nausea
- ☐ Vomiting
- ☐ Diarrhea
- ☐ Convulsions or coma
- ☐ Jaundice
- ☐ Rapid breathing
- ☐ Difficulty in breathing/respiratory distress
- ☐ Pale conjunctivae/palms
- ☐ Loss of reactivity
- ☐ Others

---

When did the symptoms for the third visit start?

---

(Please refer to the booklet)

---

Was [name\_f] diagnosed with malaria for the third visit?

- ☐ Yes
- ☐ No

(Please refer to the booklet)

---

What was the diagnosis?

---

---

Did [name\_f] take any treatment or medication for the third visit?

- ☐ Yes
- ☐ No

(Please refer to the booklet)

What treatment or medication did [name\_f] receive from the health facility?

(Please refer to the booklet)

- ☐ AL
- ☐ DHAP
- ☐ OTHER ACT (NOT AL OR DHAP)
- ☐ SP/FANSIDAR
- ☐ CHLOROQUINE
- ☐ AMODIAQUINE
- ☐ QUININE (PILLS)
- ☐ QUININE (INJECTION/IV)
- ☐ ARTESUNATE (RECTAL)
- ☐ ARTESUNATE (INJECTION/IV)
- ☐ OTHER ANTIMALARIAL
- ☐ AMOXICILLIN
- ☐ COTRIMOXAZOLE
- ☐ OTHER ANTIBIOTIC MEDICINE (PILL/SYRUP)
- ☐ OTHER ANTIBIOTIC MEDICINE (INJECTION/IV)
- ☐ ASPIRIN
- ☐ PARACETAMOL/PANADOL/ACETAMINOPHEN
- ☐ IBUPROFEN
- ☐ OTHER
- ☐ DON'TKNOW

Please list other medications [name\_f] received from the health facility.

---

Did [name\_f] take treatment or medication from the following in the past four weeks?

- ☐ No
- ☐ Friends
- ☐ Relatives
- ☐ Pharmacy/chemist
- ☐ Traditional healers

What medications did [name\_f] take from the friends?

- ☐ AL
- ☐ DHAP
- ☐ OTHER ACT (NOT AL OR DHAP)
- ☐ SP/FANSIDAR
- ☐ CHLOROQUINE
- ☐ AMODIAQUINE
- ☐ QUININE (PILLS)
- ☐ QUININE (INJECTION/IV)
- ☐ ARTESUNATE (RECTAL)
- ☐ ARTESUNATE (INJECTION/IV)
- ☐ OTHER ANTIMALARIAL
- ☐ AMOXICILLIN
- ☐ COTRIMOXAZOLE
- ☐ OTHER ANTIBIOTIC MEDICINE (PILL/SYRUP)
- ☐ OTHER ANTIBIOTIC MEDICINE (INJECTION/IV)
- ☐ ASPIRIN
- ☐ PARACETAMOL/PANADOL/ACETAMINOPHEN
- ☐ IBUPROFEN
- ☐ OTHER
- ☐ DON'TKNOW

Please list other medications [name\_f] took from the friends.

---



---

What medications did [name\_f] take from the relatives?

- ☐ AL
- ☐ DHAP
- ☐ OTHER ACT (NOT AL OR DHAP)
- ☐ SP/FANSIDAR
- ☐ CHLOROQUINE
- ☐ AMODIAQUINE
- ☐ QUININE (PILLS)
- ☐ QUININE (INJECTION/IV)
- ☐ ARTESUNATE (RECTAL)
- ☐ ARTESUNATE (INJECTION/IV)
- ☐ OTHER ANTIMALARIAL
- ☐ AMOXICILLIN
- ☐ COTRIMOXAZOLE
- ☐ OTHER ANTIBIOTIC MEDICINE (PILL/SYRUP)
- ☐ OTHER ANTIBIOTIC MEDICINE (INJECTION/IV)
- ☐ ASPIRIN
- ☐ PARACETAMOL/PANADOL/ACETAMINOPHEN
- ☐ IBUPROFEN
- ☐ OTHER
- ☐ DON'TKNOW

---

Please list other medications [name\_f] took from the relatives.

---

---

What medications did [name\_f] take from the pharmacy/chemist?

- ☐ AL
- ☐ DHAP
- ☐ OTHER ACT (NOT AL OR DHAP)
- ☐ SP/FANSIDAR
- ☐ CHLOROQUINE
- ☐ AMODIAQUINE
- ☐ QUININE (PILLS)
- ☐ QUININE (INJECTION/IV)
- ☐ ARTESUNATE (RECTAL)
- ☐ ARTESUNATE (INJECTION/IV)
- ☐ OTHER ANTIMALARIAL
- ☐ AMOXICILLIN
- ☐ COTRIMOXAZOLE
- ☐ OTHER ANTIBIOTIC MEDICINE (PILL/SYRUP)
- ☐ OTHER ANTIBIOTIC MEDICINE (INJECTION/IV)
- ☐ ASPIRIN
- ☐ PARACETAMOL/PANADOL/ACETAMINOPHEN
- ☐ IBUPROFEN
- ☐ OTHER
- ☐ DON'TKNOW

---

Please list other medications [name\_f] took from the pharmacy.

---

---

What medications did [name\_f] take from the traditional healer?

- ☐ AL
- ☐ DHAP
- ☐ OTHER ACT (NOT AL OR DHAP)
- ☐ SP/FANSIDAR
- ☐ CHLOROQUINE
- ☐ AMODIAQUINE
- ☐ QUININE (PILLS)
- ☐ QUININE (INJECTION/IV)
- ☐ ARTESUNATE (RECTAL)
- ☐ ARTESUNATE (INJECTION/IV)
- ☐ OTHER ANTIMALARIAL
- ☐ AMOXICILLIN
- ☐ COTRIMOXAZOLE
- ☐ OTHER ANTIBIOTIC MEDICINE (PILL/SYRUP)
- ☐ OTHER ANTIBIOTIC MEDICINE (INJECTION/IV)
- ☐ ASPIRIN
- ☐ PARACETAMOL/PANADOL/ACETAMINOPHEN
- ☐ IBUPROFEN
- ☐ OTHER
- ☐ DON'TKNOW

---

Please list other medications [name\_f] took from the traditional healer.

---

---

Does [name\_f] have the following symptoms now or in the last 24 hours?

- ☐ Fever
- ☐ Chills
- ☐ Profuse sweating
- ☐ Muscle/joint pain
- ☐ Abdominal pain
- ☐ Diarrhoea
- ☐ Nausea
- ☐ Vomiting
- ☐ Irritability
- ☐ Refusal to feed
- ☐ Prostration (difficulty to sit upright)
- ☐ Alteration in the level of consciousness
- ☐ Convulsions or coma
- ☐ Difficulty in breathing/respiratory distress
- ☐ Jaundice
- ☐ Others
- ☐ None

---

Please list other symptoms [name\_f] experience now or in the last 24 hours.

---

---

Did [name\_f] receive the malaria vaccine within four weeks?

- ☐ Yes
- ☐ No

---

How many times has [name\_f] received the malaria vaccine, including the latest one?

- ☐ 1 dose
- ☐ 2 doses
- ☐ 3 doses
- ☐ 4 doses
- ☐ Don't know

---

Does the structure where [name\_f] usually sleeps have ceiling nets?

- ☐ Yes
- ☐ No

# Sample

Please complete the survey below.

Thank you!

|                                           |                                                                                     |
|-------------------------------------------|-------------------------------------------------------------------------------------|
|                                           |                                                                                     |
|                                           |                                                                                     |
| Cohort ID                                 |                                                                                     |
|                                           |                                                                                     |
| First name                                |                                                                                     |
|                                           |                                                                                     |
| Middle name                               |                                                                                     |
|                                           |                                                                                     |
| Last name                                 |                                                                                     |
|                                           |                                                                                     |
| Did you sleep under a bed net last night? | <div><input type="radio"/> Yes</div> <div><input type="radio"/> No</div>            |
|                                           |                                                                                     |
| Axillary temperature (degrees Celsius)    |                                                                                     |
|                                           |                                                                                     |
| Perform finger prick                      | <div><input type="radio"/> Yes</div> <div><input type="radio"/> No</div>            |
|                                           |                                                                                     |
| Blood spots on filter paper?              | <div><input type="radio"/> Yes</div> <div><input type="radio"/> No</div>            |
|                                           |                                                                                     |
| Thick and thin blood films?               | <div><input type="radio"/> Yes</div> <div><input type="radio"/> No</div>            |
|                                           |                                                                                     |
| RDT results for P.f                       | <div><input type="radio"/> Negative</div> <div><input type="radio"/> Positive</div> |
|                                           |                                                                                     |
| RDT results for Pan                       | <div><input type="radio"/> Negative</div> <div><input type="radio"/> Positive</div> |
